# Supplementary material for: Mapping amyloid-β(16-22) nucleation pathways using fluorescence lifetime imaging microscopy
Source: Royal Society of Chemistry journal article supplement (doi:10.1039/c4sm00361f), 2014-01-01
Supplement: c4sm00361f5.pdf [file c4sm00361f5.pdf]

## ***Electronic Supplementary Information***

### **ESI Mov 1 – Initial Bubble Formation**

Initial formation of an AWI upon closing with a coverslip. The movement of a thin film aggregate can be seen in the air-region (lower dark region).

### **ESI Mov 2 – Initial Bubble Formation**

Initial formation and evolution of AWI upon closing. Note thin film aggregates within lower region and non-uniform AWI fluorescence.

### **ESI Mov 3 – Bubble Breakdown**

AWI collapse upon applied pressure. Aggregates are seen to adhere to and follow AWIs.

### **ESI Mov 4 –Bubble Breakdown**

AWI collapse on applied pressure. Note movement of thin film aggregates within bubble that become static once in solution.

Keywords: Amyloid; Peptide aggregation; AWI formation; thin-film aggregates;
